# Supplementary material
Source: PubMed Central journal article supplement (PMC10362933)
Supplement: web_material_mxac006.pdf [file web_material_mxac006.pdf]

## **Web Material**

Econometric Issues in Prospective Economic Evaluations Alongside Clinical Trials:  
Combining the Nonparametric Bootstrap with Methods that Address Missing Data

Ali Jalali, Rulla M. Tamimi, Sterling M. McPherson, and Sean M. Murphy

Web Appendix: page 1

Web Appendix - PubMed and Google Scholar search terms for economic evaluations meeting the same criteria for SUDs other than OUD

PubMed Search: (substance-related disorders[MeSH Terms]) AND (Cost-Benefit Analysis[MeSH Terms] OR cost-effective\* [All Fields] OR cost\* [All Fields] OR "cost effective\*" [All Fields]) AND ((missing\* [All Fields] OR imputation [All Fields] OR "probability weight" [All Fields] OR "Propensity score"[All Fields]) OR (bootstrap\* [All Fields] OR nonparametric [All Fields] OR non-parametric [All Fields]))

Google Scholar Search: Substance, OR opioids, OR "use disorder", OR stimulant, OR drug AND cost-effectiveness, OR "Economic Evaluation" AND clinical trial ,OR prospective AND missing AND bootstrap
